# Supplementary material for: A novel type of N-acetylglutamate synthase is involved in the first step of arginine biosynthesis in Corynebacterium glutamicum
Source: PubMed Central journal article supplement (PMC3827942; doi:10.1186/1471-2164-14-713), 2013-10-18
Supplement: 1471-2164-14-713-S1.pdf [file 1471-2164-14-713-S1.pdf]

## Additional file 1:

### Additional method: Microarray hybridization

The hybridization of whole-genome oligonucleotide microarrays was performed as described previously [48], using 10 µg of total RNA from *C. glutamicum* cultures for cDNA synthesis. The normalization and evaluation of the hybridization data was done with the software package EMMA 2 [49] using a signal intensity (A-value) cut-off of  $\geq 7.0$  and a signal intensity ratio (M-value) cut-off of  $\pm 0.6$  (corresponding to fold changes of 1.52 and 0.66, respectively).

### Comparison of gene expression in *C. glutamicum* ATCC 13032 vs. $\Delta argR$

| Coding sequence | Gene        | Fold change <sup>a</sup> | Annotation                                        |
|-----------------|-------------|--------------------------|---------------------------------------------------|
| <i>cg1580</i>   | <i>argC</i> | 9.45                     | N-acetyl-γ-glutamyl-phosphate reductase           |
| <i>cg1584</i>   | <i>argF</i> | 9.13                     | Ornithine carbamoyltransferase                    |
| <i>cg1583</i>   | <i>argD</i> | 9.06                     | Acetylornithine aminotransferase, AT class II     |
| <i>cg1581</i>   | <i>argJ</i> | 8.34                     | Glutamate N-acetyltransferase                     |
| <i>cg1582</i>   | <i>argB</i> | 7.62                     | Acetylglutamate kinase                            |
| <i>cg1586</i>   | <i>argG</i> | 6.63                     | Argininosuccinate synthase                        |
| <i>cg1588</i>   | <i>argH</i> | 5.82                     | Argininosuccinate lyase                           |
| <i>cg1813</i>   | <i>carB</i> | 5.17                     | Carbamoyl-phosphate synthase, large chain         |
| <i>cg1812</i>   | <i>pyrF</i> | 4.06                     | Orotidine-5'-phosphate decarboxylase              |
| <i>cg1814</i>   | <i>carA</i> | 3.94                     | Carbamoyl-phosphate synthase, small chain         |
| <i>cg0536</i>   |             | 3.81                     | Putative 5-dehydro-4-deoxyglucarate dehydratase   |
| <i>cg0535</i>   |             | 3.39                     | Putative ketoglutarate semialdehyde dehydrogenase |
| <i>cg0534</i>   |             | 2.91                     | Putative integral membrane protein                |
| <i>cg3226</i>   |             | 2.43                     | Putative MFS-type L-lactate permease              |
| <i>cg3145</i>   |             | 2.36                     | Hypothetical protein                              |
| <i>cg2636</i>   | <i>catA</i> | 2.33                     | Catechol 1,2-dioxygenase                          |
| <i>cg0611</i>   |             | 2.25                     | Putative secreted protein                         |
| <i>cg3227</i>   | <i>lldD</i> | 2.17                     | Quinone dependent L-lactate dehydrogenase         |
| <i>cg1589</i>   |             | 1.95                     | Putative secreted protein                         |
| <i>cg0749</i>   | <i>spoU</i> | 1.87                     | Putative tRNA/rRNA methyltransferase              |

|               |              |      |                                                                                     |
|---------------|--------------|------|-------------------------------------------------------------------------------------|
| <i>cg1737</i> | <i>acn</i>   | 1.82 | Aconitate hydratase                                                                 |
| <i>cg0607</i> |              | 1.77 | Putative secreted protein                                                           |
| <i>cg3431</i> | <i>rnpA</i>  | 1.74 | Ribonuclease P                                                                      |
| <i>cg2546</i> |              | 1.73 | Putative secondary C4-dicarboxylate transporter, TRAP-T family                      |
| <i>cg0446</i> | <i>sdhA</i>  | 1.69 | Succinate dehydrogenase, subunit A                                                  |
| <i>cg1695</i> |              | 1.67 | Conserved hypothetical protein, probably HTH-type transcriptional reg.              |
| <i>cg0228</i> |              | 1.65 | Two-component system, sensory histidine kinase, putative pseudogene                 |
| <i>cg2320</i> |              | 1.64 | Putative transcriptional regulator, ArsR-family                                     |
| <i>cg1343</i> | <i>narH</i>  | 1.62 | Respiratory nitrate reductase 2, beta chain                                         |
| <i>cg2235</i> | <i>rpIS</i>  | 1.61 | 50S ribosomal protein L19                                                           |
| <i>cg2348</i> |              | 1.60 | Putative secreted protein                                                           |
| <i>cg1090</i> | <i>ggtB</i>  | 1.58 | Putative gamma-glutamyltranspeptidase                                               |
| <i>cg0445</i> | <i>sdhCD</i> | 1.57 | Succinate dehydrogenase, subunit CD                                                 |
| <i>cg1546</i> | <i>rbsK1</i> | 1.57 | Putative ribokinase                                                                 |
| <i>cg2751</i> |              | 1.57 | Xanthosine triphosphate pyrophosphatase                                             |
| <i>cg0961</i> |              | 1.54 | Putative hydrolase, alpha/beta-fold                                                 |
| <i>cg2402</i> |              | 1.54 | Secreted protein NLP/P60 family                                                     |
| <i>cg2574</i> |              | 1.54 | Put. threonine efflux transporter, resistance to homoserine/threonine (RhtB) family |
| <i>cg1680</i> |              | 1.53 | Short-chain dehydrogenase/reductase                                                 |
| <i>cg2071</i> | <i>int2'</i> | 1.53 | Putative phage Integrase (N-terminal fragment)                                      |
| <i>cg0447</i> | <i>sdhB</i>  | 1.52 | Succinate dehydrogenase, subunit B                                                  |
| <i>cg1279</i> |              | 0.66 | Putative secreted protein                                                           |
| <i>cg2199</i> | <i>pbp</i>   | 0.66 | Putative penicillin-binding protein                                                 |
| <i>cg2824</i> |              | 0.66 | SAM-dependent methyltransferase                                                     |
| <i>cg0009</i> |              | 0.65 | Putative membrane protein                                                           |
| <i>cg0365</i> |              | 0.65 | Putative membrane protein                                                           |
| <i>cg0926</i> |              | 0.65 | ABC-type putative iron-siderophore transporter, permease subunit                    |
| <i>cg0119</i> | <i>ureD</i>  | 0.65 | Urease accessory protein UreD                                                       |
| <i>cg1405</i> |              | 0.64 | Siderophore-interacting protein                                                     |
| <i>cg2777</i> |              | 0.63 | Conserved putative membrane protein                                                 |
| <i>cg2052</i> |              | 0.63 | Putative secreted protein                                                           |
| <i>cg0924</i> |              | 0.62 | ABC-type putative iron-siderophore transporter, substrate-binding lipoprotein       |
| <i>cg2962</i> |              | 0.62 | Hypothetical protein                                                                |
| <i>cg0726</i> |              | 0.61 | Putative secreted lipoprotein                                                       |

|               |             |      |                                                                                  |
|---------------|-------------|------|----------------------------------------------------------------------------------|
| <i>cg1120</i> | <i>ripA</i> | 0.60 | Putative transcriptional regulator, AraC-family                                  |
| <i>cg2950</i> | <i>radA</i> | 0.60 | Putative ATP-dependent protease, involved in DNA repair                          |
| <i>cg0767</i> |             | 0.58 | Siderophore-interacting protein                                                  |
| <i>cg2283</i> |             | 0.58 | Conserved hypothetical protein                                                   |
| <i>cg0927</i> |             | 0.58 | ABC-type putative iron-siderophore transporter, permease subunit                 |
| <i>cg1931</i> |             | 0.57 | Putative secreted protein                                                        |
| <i>cg1476</i> | <i>thiC</i> | 0.57 | Thiamine biosynthesis protein ThiC                                               |
| <i>cg0748</i> |             | 0.57 | ABC-type putative iron-siderophore transporter, substrate-binding lipoprotein    |
| <i>cg1930</i> |             | 0.54 | Putative secreted hydrolase                                                      |
| <i>cg0922</i> |             | 0.52 | ABC-type putative iron-siderophore transporter, substrate-binding lipoprotein    |
| <i>cg0771</i> | <i>irp1</i> | 0.50 | ABC-type putative iron-siderophore transporter, substrate-binding lipoprotein    |
| <i>cg4005</i> |             | 0.50 | Putative secreted protein                                                        |
| <i>cg1514</i> |             | 0.49 | Secreted protein                                                                 |
| <i>cg1412</i> | <i>rbsC</i> | 0.39 | ABC-type ribose transporter, permease subunit (TC 3.A.1.2.1)                     |
| <i>cg0405</i> |             | 0.38 | ABC-type putative iron(III) dicitrate transporter, substrate-binding lipoprotein |
| <i>cg1411</i> | <i>rbsA</i> | 0.38 | ABC-type ribose transporter, ATPase subunit (TC 3.A.1.2.1)                       |
| <i>cg0471</i> |             | 0.37 | Conserved secreted protein                                                       |
| <i>cg1413</i> | <i>rbsB</i> | 0.25 | ABC-type ribose transporter, substrate-binding lipoprotein (TC 3.A.1.2.1)        |
| <i>cg1585</i> | <i>argR</i> | 0.16 | Transcriptional repressor of arginine biosynthesis, ArgR-family                  |

---

All genes that showed an alteration of transcript levels at least by a factor of  $\pm 2$  in two independent transcriptome analyses (biological replicates) using DNA microarrays with fourfold genome coverage are listed.

<sup>a</sup> Fold change, signal intensity ratio as defined by  $2^{(m\text{-value})}$ .
