# Supplementary material for: A novel type of N-acetylglutamate synthase is involved in the first step of arginine biosynthesis in Corynebacterium glutamicum
Source: PubMed Central journal article supplement (PMC3827942; doi:10.1186/1471-2164-14-713), 2013-10-18
Supplement: 1471-2164-14-713-S9.pdf [file 1471-2164-14-713-S9.pdf]

Additional file 9: Oligonucleotides used as primers to construct defined *C. glutamicum* deletion mutants and expression plasmids

| Name               | Sequence <sup>a</sup>                                                         | Product        |
|--------------------|-------------------------------------------------------------------------------|----------------|
| <i>argR_d1</i>     | GATCTAGAATTCTCGTGCGGAATTCGTGGA                                                | <i>ΔargR</i>   |
| <i>argR_d2</i>     | TTACCTGTGAGCGGATCATGTACCTGGCTGGTGACT                                          |                |
| <i>argR_d3</i>     | TGATCCGCTCACAGGTAA                                                            |                |
| <i>argR_d4</i>     | GATCTAGGATCCCTCAACGAGGTGCTTGAC                                                |                |
| <i>argC_d1</i>     | GGTGGTCTCGAATTACCGTAAGCTTGCGGCTTCC                                            | <i>ΔargC</i>   |
| <i>argC_d2</i>     | CGCCGCTTTAAGGCGTACTTGCAAATTATTCATGCATAAA                                      |                |
| <i>argC_d3</i>     | AGTAGCGCCTTAAAGCGGCG                                                          |                |
| <i>argC_d4</i>     | GGTGGTCTCGGATCCTGCACCATTGTCACCCAAA                                            |                |
| <i>argJ_d1</i>     | GGTCAATTGCGCCACACCCCGGAAATTGC                                                 | <i>ΔargJ</i>   |
| <i>argJ_d2</i>     | AGTTGGAGTGCTGTTTCTTTGTGGAACCTCCTACTGAATT                                      |                |
| <i>argJ_d3</i>     | AAAGAAACAGCACTCCAACCT                                                         |                |
| <i>argJ_d4</i>     | GGTAGATCTAGTGGGTACGCCATCGATGT                                                 |                |
| <i>argB_d1</i>     | GGTGGTCTCGAATTCAACTCAGGATGAACTCAACG                                           | <i>ΔargB</i>   |
| <i>argB_d2</i>     | CAAGTTTCCAGCGTGCTCATTGCCTGTGCCCTTTTCCCTG                                      |                |
| <i>argB_d3</i>     | ATGAGCACGCTGGAAACTTG                                                          |                |
| <i>argB_d4</i>     | GGTGGTCTCGGATCGGGTAGAACTCCACACCGCT                                            |                |
| <i>argD_d1</i>     | GGTGAATTC TTGGTTTGGTTCGGAGACATC                                               | <i>ΔargD</i>   |
| <i>argD_d2</i>     | AAGTCATAAGTTTGAGTCTTTTACAGTTCCCATCCTTG                                        |                |
| <i>argD_d3</i>     | AGGACTCAAACCTTATGACTT                                                         |                |
| <i>argD_d4</i>     | GGTAGATCTCAGCCTTCTTACCCTTAAGG                                                 |                |
| <i>argRG_d1</i>    | GGTGGTCTCGAATTCAGGCCTTAAGGGTAAGAAG                                            | <i>ΔargRG</i>  |
| <i>argRG_d2</i>    | TGGATGCTTGAAAAGGTGGCGTCTTACCTCGGCTGGTTGG                                      |                |
| <i>argRG_d3</i>    | GCCACCTTTTCAAGCATCCA                                                          |                |
| <i>argRG_d4</i>    | GGTGGTCTCGGATCGAGGGCGTCGACAAGCTCGG                                            |                |
| <i>argH_d1</i>     | GGTGGTCTCGAATTTCAAGTCCC GCGAAATCTAC                                           | <i>ΔargH</i>   |
| <i>argH_d2</i>     | AAGCAGCACAGGCCATAAACGTTCCATGTGGTGTCTTCT                                       |                |
| <i>argH_d3</i>     | GTTTATGGCCTGTGCTGCTT                                                          |                |
| <i>argH_d4</i>     | GGTGGTCTCGGATCTCGGTGATGGTCCGAATGT                                             |                |
| <i>cg3035_d1</i>   | GGTGGTCAATTGAAATCCCAGAGACCATGCC                                               | <i>Δcg3035</i> |
| <i>cg3035_d2</i>   | TACCCTAGCTGTTTTGGATTTCCGCATCAGACGGCATCCC                                      |                |
| <i>cg3035_d3</i>   | AATCCAAAACAGCTAGGGTA                                                          |                |
| <i>cg3035_d4</i>   | GGTGGTAGATCTTGAAGTCGCCGAGCAACACC                                              |                |
| <i>argA_RedET1</i> | AACAGAATAAAAATACACTAATTTTCAATAATCATGCAAA -<br>GAGGTGTGCCAACCCCTCACTAAAGGGCGGC | <i>ΔargA</i>   |
| <i>argA_RedET2</i> | GGATGCGACGTACGAGTGTTACGCATGTCGCATCCGAC-<br>GATTTTCATCGCCGACTCACTATAGGGCTCGA   |                |
| <i>argA_e1</i>     | AGGTCTCGAATTGAAAGGAGGACAACCGTGGTAAAGG-<br>AACGTAAAAC                          | <i>argA</i>    |
| <i>argA_e2</i>     | AGGTCTCGGATCGTTACCCTAAATCCGCCATCA                                             |                |
| <i>argJ_e1</i>     | GGGTCTCTAATTAAAGGAGGACAACCATATGGCAGAAA-<br>AAGGCATTAC                         | <i>argJ</i>    |
| <i>argJ_e2</i>     | GGTCTCCTCGATTACCCGGGAGAGCTGTACGCGGAGTTGA                                      |                |
| <i>cg3035_e1</i>   | AGGTCTCGAATTGAAAGGAGGACAACCATGACGCCTAG-<br>TCTTCCCG                           | <i>cg3035</i>  |
| <i>cg3035_e2</i>   | AGGTCTCGGATCGTTAGAATTTCCGTTCCGGCGT                                            |                |

<sup>a</sup> Underlines indicate restriction sites added for cloning. Italics denotes annealing regions for gene SOEing PCR primers or in case of the RedET recombination system overlaps for the cassette. The artificial RBS is given in boldface.
