# Supplementary material for: A novel type of N-acetylglutamate synthase is involved in the first step of arginine biosynthesis in Corynebacterium glutamicum
Source: PubMed Central journal article supplement (PMC3827942; doi:10.1186/1471-2164-14-713), 2013-10-18
Supplement: 1471-2164-14-713-S10.pdf [file 1471-2164-14-713-S10.pdf]

Additional file 10: Plasmids used for targeted deletions

| <b>Name</b>                   | <b>Relevant genotype/ information</b>                                       | <b>Reference/ source</b> |
|-------------------------------|-----------------------------------------------------------------------------|--------------------------|
| pK18:: $\Delta$ <i>argR</i>   | pK18 <i>mobsacB</i> with a 346 bp deletion construct of gene <i>argR</i>    | This study               |
| pK18:: $\Delta$ <i>argC</i>   | pK18 <i>mobsacB</i> with a 1044 bp deletion construct of gene <i>argC</i>   | This study               |
| pK18:: $\Delta$ <i>argJ</i>   | pK18 <i>mobsacB</i> with a 1166 bp deletion construct of gene <i>argJ</i>   | This study               |
| pK18:: $\Delta$ <i>argB</i>   | pK18 <i>mobsacB</i> with a 953 bp deletion construct of gene <i>argB</i>    | This study               |
| pK18:: $\Delta$ <i>argD</i>   | pK18 <i>mobsacB</i> with a 1175 bp deletion construct of gene <i>argD</i>   | This study               |
| pK18:: $\Delta$ <i>argFR</i>  | pK18 <i>mobsacB</i> with a deletion construct of genes <i>argFR</i>         | [48]                     |
| pK18:: $\Delta$ <i>argRG</i>  | pK18 <i>mobsacB</i> with a 1889 bp deletion construct of genes <i>argRG</i> | This study               |
| pK18:: $\Delta$ <i>argH</i>   | pK18 <i>mobsacB</i> with a 1434 bp deletion construct of gene <i>argH</i>   | This study               |
| pK18:: $\Delta$ <i>cg3035</i> | pK18 <i>mobsacB</i> with a 829 bp deletion construct of gene <i>cg3035</i>  | This study               |
