# Supplementary material for: A novel type of N-acetylglutamate synthase is involved in the first step of arginine biosynthesis in Corynebacterium glutamicum
Source: PubMed Central journal article supplement (PMC3827942; doi:10.1186/1471-2164-14-713), 2013-10-18
Supplement: 1471-2164-14-713-S11.pdf [file 1471-2164-14-713-S11.pdf]

Additional file 11: Parameters for microTOF control in full scan MS mode

|                       |                                |              |                             |                         |
|-----------------------|--------------------------------|--------------|-----------------------------|-------------------------|
| <b>Mode</b>           | <b>Scan Mode</b>               | MS           | <b>Ion Polarity</b>         | Positive                |
|                       | <b>Mass Range</b>              | 50-1000 m/z  | <b>Rolling Average</b>      | off                     |
|                       | <b>Spectra Acquisition</b>     | Save Spectra | <b>Absolute Threshold</b>   | 10                      |
|                       | <b>Include Profile Spectra</b> | Always       | <b>Peak Summation Width</b> | 5 pts                   |
|                       | <b>Focus</b>                   | Inactive     | <b>Acquisition Rate</b>     | 1.0 Hz                  |
| <b>Source</b>         | <b>Endplate Offset</b>         | -500 V       | <b>Dry Gas</b>              | 8.0 L min <sup>-1</sup> |
|                       | <b>Capillary</b>               | -2500 V      | <b>Dry Temp</b>             | 180 °C                  |
|                       | <b>Nebulizer</b>               | 3.0 bar      |                             |                         |
| <b>Transfer</b>       | <b>Funnel 1 RF</b>             | 180.0 Vpp    | <b>ISCID Energy</b>         | 0.0 eV                  |
|                       | <b>Funnel 2 RF</b>             | 200.0 Vpp    | <b>Hexapole RF</b>          | 100.0 Vpp               |
| <b>Quadrupole</b>     | <b>Ion Energy</b>              | 5.0 eV       | <b>Low Mass</b>             | 100.00 m/z              |
| <b>Collision Cell</b> | <b>Collision Energy</b>        | 10.0 eV      | <b>Collision RF</b>         | 150.0 Vpp               |
|                       | <b>Transfer Time</b>           | 70.0 μs      | <b>Pre Puls Storage</b>     | 7.0 μs                  |
