# Supplementary material for: A novel type of N-acetylglutamate synthase is involved in the first step of arginine biosynthesis in Corynebacterium glutamicum
Source: PubMed Central journal article supplement (PMC3827942; doi:10.1186/1471-2164-14-713), 2013-10-18
Supplement: 1471-2164-14-713-S12.pdf [file 1471-2164-14-713-S12.pdf]

Additional file 12: Additional parameters for microTOF control in MS/MS (MRM) mode

| <b>Time Segment</b> | <b>Isol. Mass</b> | <b>Isol. Width</b> | <b>Coll. Energy</b> | <b>ISCID Energy</b> | <b>Acq. Factor</b> |
|---------------------|-------------------|--------------------|---------------------|---------------------|--------------------|
| 0.5 -2.5 min        | 190.10            | 10.00              | 20.00               | 0.0                 | 1.0                |
